# Supplementary material for: Transition patterns of metabolic dysfunction-associated fatty liver disease status in relation to arterial stiffness progression: a health check-up cohort study
Source: Springer Nature journal article supplement (doi:10.1038/s41598-023-35733-0), 2023-06-15
Supplement: MOESM1 [file 41598_2023_35733_MOESM1_ESM.pdf]

# **Transition patterns of metabolic dysfunction-associated fatty liver disease status in relation to arterial stiffness progression: A health check-up cohort study**

## **Clinical and lifestyle characteristics definition**

Normal weight ( $18.5 \text{ kg/m}^2 \leq \text{BMI} < 24 \text{ kg/m}^2$ ), overweight ( $24 \text{ kg/m}^2 \leq \text{BMI} < 28 \text{ kg/m}^2$ ), and obesity ( $\text{BMI} \geq 28 \text{ kg/m}^2$ ) were defined using the standard weight criteria for adults in China. Hypertension was defined as systolic blood pressure  $\geq 140 \text{ mm Hg}$  or diastolic blood pressure  $\geq 90 \text{ mm Hg}$  or specific drug treatment<sup>[1]</sup>. Type 2 diabetes was diagnosed by fasting glucose  $\geq 126 \text{ mg/dL}$  or specific drug treatment<sup>[2]</sup>. Dyslipidemia was defined as the presence of low-density lipoprotein cholesterol ( $\geq 140 \text{ mg/dl}$ ), high-density lipoprotein cholesterol ( $\geq 40 \text{ mg/dl}$ ), elevated triglyceride level ( $\geq 150 \text{ mg/dl}$ ), or treatment for dyslipidemia<sup>[3]</sup>.

Current smoking was coded 'present' if more than one cigarette per day (on average) was consumed over a period longer than six months. Current drinking was coded 'present' if the individual reported consumption of beer, wine (including Chinese wine) and/or liquor at least two days per week over a period exceeding 12 months. Individuals were considered physically active when reporting more than three days of moderate-intensity exercise.

Positive liver ultrasound findings included the following 5 criteria: 1) parenchymal brightness, 2) liver-to-kidney contrast, 3) deep beam attenuation, 4) bright vessel walls, and 5) gallbladder wall definition<sup>[4]</sup>. Subjects with at least two abnormal findings were diagnosed with hepatic steatosis<sup>[5]</sup>.

## **References**

- [1] P.A. James, S. Oparil, B.L. Carter, et al. 2014 evidence-based guideline for the management of high blood pressure in adults: report from the panel members appointed to the Eighth Joint National Committee (JNC 8)[J]. JAMA. 2014, 311(5), 507-520. DOI: 10.1001/jama.2013.284427.
- [2] W. Kerner, J. Bruckel, A. German Diabetes Definition, classification and diagnosis of diabetes mellitus[J]. Exp. Clin. Endocrinol. Diabetes. 2014, 122(7), 384-386. DOI: 10.1055/s-0034-1366278.
- [3] W. Yang, J. Xiao, Z. Yang, et al. Serum lipids and lipoproteins in Chinese men and women[J]. Circulation. 2012, 125(18), 2212-2221. DOI: 10.1161/CIRCULATIONAHA.111.065904.
- [4] N.N. III. Hepatic Steatosis Ultrasound Images Assessment Procedures Manual 2010.[J].
- [5] G.C. Farrell, S. Chitturi, G.K. Lau, et al. Guidelines for the assessment and management of non-alcoholic fatty liver disease in the Asia-Pacific region: executive summary[J]. J. Gastroenterol. Hepatol. 2007, 22(6), 775-777. DOI: 10.1111/j.1440-1746.2007.05002.x.

**Supplemental Table 1. Study population clinical characteristics at baseline (n = 8,807) stratified by MAFLD status.**

|                                      | MAFLD             |                                |
|--------------------------------------|-------------------|--------------------------------|
|                                      | No                | Yes                            |
| <b>Prevalence, n (%)</b>             | 5273 (59.9)       | 3534 (40.1)                    |
| <b>Demographic factors</b>           |                   |                                |
| Age, years                           | 46.6 ± 10.1       | 46.8 ± 9.2                     |
| Male sex, n (%)                      | 3067 (58.2)       | 3025 (85.6) <sup>a</sup>       |
| University degree, n (%)             | 2400 (45.5)       | 1724 (48.8) <sup>a</sup>       |
| <b>Lifestyle status</b>              |                   |                                |
| Current smoker, n (%)                | 1025 (19.4)       | 908 (25.7) <sup>a</sup>        |
| Current drinker, n (%)               | 1492 (28.3)       | 1257 (35.6) <sup>a</sup>       |
| Physical activity, n (%)             | 2119 (40.2)       | 1203 (34.0) <sup>a</sup>       |
| <b>Classic vascular risk factors</b> |                   |                                |
| Body-mass index, kg/m <sup>2</sup>   | 23.3 ± 2.8        | 26.6 ± 2.5 <sup>a</sup>        |
| Waist circumference, cm              | 80.2 ± 8.6        | 90.4 ± 7.0 <sup>a</sup>        |
| Heart rate, beats/min                | 71.2 ± 10.9       | 72.5 ± 10.7 <sup>a</sup>       |
| Systolic blood pressure, mm Hg       | 122.3 ± 16.4      | 127.4 ± 14.6 <sup>a</sup>      |
| Diastolic blood pressure, mm Hg      | 76.1 ± 11.3       | 81.3 ± 11.0 <sup>a</sup>       |
| Hypertension, n (%)                  | 767 (14.5)        | 847 (24.0) <sup>a</sup>        |
| Anti-hypertensive medication, n (%)  | 288 (5.5)         | 383 (7.6) <sup>a</sup>         |
| Fasting glucose, mmol/L              | 5.31 ± 1.14       | 5.66 ± 1.36 <sup>a</sup>       |
| Diabetes mellitus, n (%)             | 254 (4.8)         | 392 (11.1) <sup>a</sup>        |
| Anti-diabetes medication, n (%)      | 92 (1.7)          | 196 (5.5) <sup>a</sup>         |
| Triglycerides, mmol/L                | 1.26 (0.91, 1.84) | 2.02 (1.41, 3.03) <sup>a</sup> |
| HDL-C cholesterol, mmol/L            | 1.51 ± 0.38       | 1.29 ± 0.27 <sup>a</sup>       |
| LDL-C cholesterol, mmol/L            | 2.77 ± 0.83       | 2.77 ± 0.88                    |
| Dyslipidemia, n (%)                  | 1334 (25.3)       | 1771 (50.1) <sup>a</sup>       |

|                                         |                     |                                  |
|-----------------------------------------|---------------------|----------------------------------|
| Anti-dyslipidemia medication, n (%)     | 86 (1.6)            | 61 (1.7)                         |
| <b>Emerging risk factors and others</b> |                     |                                  |
| Albumin, g/L                            | 46.1 ± 2.7          | 46.7 ± 2.7 <sup>a</sup>          |
| Total bilirubin, µmol/L                 | 15.5 ± 5.1          | 15.3 ± 5.3                       |
| ALT, U/L                                | 20.0 (15.0, 28.0)   | 30.0 (22.0, 43.0) <sup>a</sup>   |
| AST, U/L                                | 22.0 (18.0, 25.0)   | 24.0 (21.0, 28.0) <sup>a</sup>   |
| FIB-4                                   | 0.47 (0.33, 0.66)   | 0.36 (0.25, 0.51) <sup>a</sup>   |
| eGFR, mL/min/1.73m <sup>2</sup>         | 109.9 (95.4, 126.1) | 105.1 (92.3, 120.2) <sup>a</sup> |
| <b>Arterial stiffness</b>               |                     |                                  |
| Ba-PWV, cm/s                            | 1300 (1181, 1451)   | 1365 (1245, 1510) <sup>a</sup>   |
| Increased ba-PWV, n (%)                 | 1656 (31.4)         | 1495 (42.3) <sup>a</sup>         |

HDL, high-density lipoprotein; LDL, low-density lipoprotein; ALT, alanine aminotransferase; AST: aspartate aminotransferase; eGFR, estimated glomerular filtration rate; ba-PWV, brachial-ankle pulse wave velocity.

**Supplemental Table 2. The fibrosis probability of MAFLD at baseline with incident arterial stiffness in the persistent MAFLD population (n = 1,697).**

|                         | Person-<br>years | Incident<br>cases | Rate*  | The incident arterial stiffness |                |                        |                |                        |                |
|-------------------------|------------------|-------------------|--------|---------------------------------|----------------|------------------------|----------------|------------------------|----------------|
|                         |                  |                   |        | Model 1                         |                | Model 2                |                | Model 3                |                |
|                         |                  |                   |        | HR (95% CI)                     | <i>P</i> value | HR (95% CI)            | <i>P</i> value | HR (95% CI)            | <i>P</i> value |
| FIB-4 score             |                  |                   |        |                                 |                |                        |                |                        |                |
| Low (< 1.30) (n = 1659) | 7344.8           | 479               | 65.22  | 1.00 (Reference)                |                | 1.00 (Reference)       |                | 1.00 (Reference)       |                |
| High (≥1.30) (n = 38)   | 175.1            | 19                | 108.52 | 1.92 (1.21–3.04) 0.005          |                | 1.82 (1.02–3.32) 0.042 |                | 1.65 (0.92–2.96) 0.095 |                |

Estimated from Cox proportional hazard models.

\*Rate per 100,000 person-years.

Model 1 adjusted for sex. Age-adjusted models were not calculated because age was used for calculating the FIB-4 scores.

Model 2 adjusted for Model 1 variables plus year of screening exam, education level, current smoking, current drinking, physical activity, anti-hypertensive medication, anti-diabetes mellitus medication, anti-dyslipidemic medication, waist circumference, systolic blood pressure, fasting glucose, triglycerides, LDL cholesterol, HDL cholesterol, estimated GFR, total bilirubin and albumin at baseline.

Model 3 adjusted for Model 2 variables plus ba-PWV at baseline.

Abbreviations: MAFLD, metabolic dysfunction–associated fatty liver disease; HR, hazard ratio; CI, confidence interval.

**Supplemental Table 3. Association between MAFLD transition patterns and the annual increase in ba-PWV in all population samples (n = 8,807).**

|                          | The annual ba-PWV change rate |                |  |                              |                |  |                              |                |
|--------------------------|-------------------------------|----------------|--|------------------------------|----------------|--|------------------------------|----------------|
|                          | Model 1                       |                |  | Model 2                      |                |  | Model 3                      |                |
|                          | coefficient $\beta$ (95% CI)  | <i>P</i> value |  | coefficient $\beta$ (95% CI) | <i>P</i> value |  | coefficient $\beta$ (95% CI) | <i>P</i> value |
| MAFLD progression status |                               |                |  |                              |                |  |                              |                |
| None (n = 3674)          | 1.00 (Reference)              |                |  | 1.00 (Reference)             |                |  | 1.00 (Reference)             |                |
| Developed (n = 1599)     | 7.50 (2.55–12.46)             | 0.003          |  | 7.24 (1.39–13.10)            | 0.015          |  | 6.77 (4.14–9.40)             | <0.001         |
| Regressed (n = 592)      | -2.75 (-10.06–4.56)           | 0.461          |  | -1.15 (-9.06–6.77)           | 0.777          |  | 1.32 (-2.23–4.86)            | 0.466          |
| Persistent (n = 2942)    | 6.14 (1.88–10.41)             | 0.005          |  | 8.96 (3.26–14.66)            | 0.002          |  | 6.86 (4.16–9.56)             | <0.001         |

Estimated from linear mixed models.

Model 1 adjusted for age and sex.

Model 2 adjusted for Model 1 variables plus education level, current smoking, current drinking, physical activity, presence of hypertension and diabetes mellitus, lipid-lowering medical use, heart rate, waist circumference, systolic blood pressure, fasting glucose, triglycerides, LDL cholesterol, HDL cholesterol, FIB-4, estimated GFR, total bilirubin and albumin at baseline.

Model 3 adjusted for Model 2 variables plus ba-PWV at baseline.

MAFLD, metabolic dysfunction–associated fatty liver disease; CI, confidence interval.

**Supplemental Table 4. Association between MAFLD transition patterns and incident arterial stiffness in the population free of arterial stiffness at baseline (n = 5,253).**

|                 | Person-<br>years | Incident<br>cases | Rate* | The incident arterial stiffness |                |                  |                |                  |                |
|-----------------|------------------|-------------------|-------|---------------------------------|----------------|------------------|----------------|------------------|----------------|
|                 |                  |                   |       | Model 1                         |                | Model 2          |                | Model 3          |                |
|                 |                  |                   |       | HR (95% CI)                     | <i>P</i> value | HR (95% CI)      | <i>P</i> value | HR (95% CI)      | <i>P</i> value |
| None (n = 2519) | 10087.6          | 424               | 42.0  | 1.00 (Reference)                |                | 1.00 (Reference) |                | 1.00 (Reference) |                |

|                       |        |     |      |                  |        |                  |       |                  |       |
|-----------------------|--------|-----|------|------------------|--------|------------------|-------|------------------|-------|
| Developed (n = 905)   | 4142.3 | 288 | 69.5 | 1.44 (1.24–1.69) | <0.001 | 1.30 (1.05–1.61) | 0.018 | 1.20 (0.97–1.49) | 0.159 |
| Regressed (n = 318)   | 1485.0 | 84  | 56.6 | 0.89 (0.70–1.14) | 0.350  | 0.99 (0.73–1.36) | 0.980 | 0.95 (0.70–1.30) | 0.386 |
| Persistent (n = 1511) | 6700.3 | 467 | 69.7 | 1.43 (1.24–1.64) | <0.001 | 1.35 (1.07–1.72) | 0.012 | 1.25 (0.98–1.58) | 0.064 |

Estimated from Cox proportional hazard models.

\*Rate per 100,000 person-years.

Model 1 adjusted for age and sex.

Model 2 adjusted for Model 1 variables plus year of screening exam, education level, current smoking, current drinking, physical activity, anti-hypertensive medication, anti-diabetes mellitus medication, anti-dyslipidemic medication, waist circumference, systolic blood pressure, fasting glucose, triglycerides, LDL cholesterol, HDL cholesterol, FIB-4, estimated GFR, total bilirubin and albumin at baseline.

Model 3 adjusted for Model 2 variables plus ba-PWV at baseline.

Abbreviations: MAFLD, metabolic dysfunction–associated fatty liver disease; HR, hazard ratio; CI, confidence interval.
